# Supplementary material for: Synthesis, characterization and evaluation of hollow molecularly imprinted polymers for Sudan I
Source: Royal Society of Chemistry journal article supplement (doi:10.1039/c4ay00382a), 2014-01-01
Supplement: c4ay00382a1.pdf [file c4ay00382a1.pdf]

## Electronic Supplementary Information (ESI)

### Synthesis, characterization and evaluation of hollow molecularly imprinted polymers for Sudan I

**Dong Ren<sup>a</sup>, Jiang He<sup>\*a</sup>, Haixia Zhang<sup>ab</sup>**

<sup>a</sup>State Key Laboratory of Applied Organic Chemistry, Lanzhou University, Lanzhou 730000, P. R. China

<sup>b</sup>Testing Demonstration Center for Food quality & safety of the Ministry of Industry & Information, Lanzhou 730000, P. R. China

\*Corresponding author: Jiang He, Tel.: +86 (931) 891 2591, Fax: +86 (931) 891 2582, E-mail: [hejiang@lzu.edu.cn](mailto:hejiang@lzu.edu.cn)

Fig. S1 The chemical structures of Sudan I-IV.

Fig. S2 FT-IR spectra of SPS (a), PS/SiO<sub>2</sub> (b), M/PS/SiO<sub>2</sub> (c), MHSiO<sub>2</sub> (d), HMIPs (e), and HNIPs (f).

Fig. S3 TG curves of PS/SiO<sub>2</sub>, HMIPs, and HNIPs.

Fig. S4 HPLC-UV Chromatograms of Sudan I standard solution of 0.40 nmol mL<sup>-1</sup> (a), non-spiked chilli powder sample with (b) and without (c) HMIPs treated. **The experimental conditions in the text.**

Fig. S5 SEM results of HMIPs before (a) and after (b) six cycles used.
